# Supplementary material for: Built Environment and Health Behaviors: Deconstructing the Black Box of Interactions—A Review of Reviews
Source: MDPI journal article supplement (doi:10.3390/ijerph16081454), 2019-04-24
Supplement: s1 [file s1]

**Supplementary Table S7 – Excluded records with reasons for exclusion (n=61)**

| <b>Records</b>                                                                                                                                                                                                                                                                                                                                            | <b>Reason for exclusion</b>                                                                 |
|-----------------------------------------------------------------------------------------------------------------------------------------------------------------------------------------------------------------------------------------------------------------------------------------------------------------------------------------------------------|---------------------------------------------------------------------------------------------|
| Afshin, A., Penalvo, J., Del Gobbo, L., Kashaf, M., Micha, R., Morrish, K., ... Mozaffarian, D. (2015). CVD Prevention Through Policy: a Review of Mass Media, Food/Menu Labeling, Taxation/Subsidies, Built Environment, School Procurement, Worksite Wellness, and Marketing Standards to Improve Diet. <i>Current Cardiology Reports</i> , 17(11), 98. | Not a systematic search                                                                     |
| Anaby, D., Hand, C., Bradley, L., DiRezze, B., Forhan, M., DiGiacomo, A., & Law, M. (2013). The effect of the environment on participation of children and youth with disabilities: a scoping review. <i>Disability and Rehabilitation</i> , 35(19), 1589–1598.                                                                                           | Focus on participation as the main outcome and not on diet or PA                            |
| Anderson, W. P.; Steyn, N. P. (2009). Interventions on diet and physical activity: What works summary report. <i>Geneva: World Health Organization</i> , 48.                                                                                                                                                                                              | The built environment is not specifically examined                                          |
| Beard, J. R., & Petitot, C. (2011). Ageing and urbanization: Can cities be designed to foster active ageing? <i>Public Health Reviews</i> .                                                                                                                                                                                                               | No specific focus on PA related outcomes in relationship to the built environment           |
| Biddle, S. J. H., Atkin, A. J., Cavill, N., & Foster, C. (2011). Correlates of physical activity in youth: a review of quantitative systematic reviews. <i>International Review of Sport and Exercise Psychology</i> , 4(1), 25–49.                                                                                                                       | No specific focus on the built environment                                                  |
| Bird, E.L., Ige, J.O., Pilkington, P., Pinto, A., Petrokofsky, C., Burgess-Allen, J., (2018). Built and natural environment planning principles for promoting health: an umbrella review. <i>BMC Public Health</i> .18.                                                                                                                                   | Review of reviews describing papers already selected                                        |
| Bodde, A. E., & Seo, D.-C. (2009). A review of social and environmental barriers to physical activity for adults with intellectual disabilities. <i>Disability and Health Journal</i> , 2(2), 57–66.                                                                                                                                                      | No specific focus on the built environment which is not being examined in detail            |
| Broome, K., McKenna, K., Fleming, J., & Worrall, L. (2009). Bus use and older people: a literature review applying the Person-Environment-Occupation model in macro practice. <i>Scandinavian Journal of Occupational Therapy</i> , 16(1), 3–12.                                                                                                          | Not a systematic search                                                                     |
| Brown, V., Moodie, M., & Carter, R. (2017). Evidence for associations between traffic calming and safety and active transport or obesity: A scoping review. <i>Journal of Transport &amp; Health</i> , 7(A), 23–37.                                                                                                                                       | No direct relationship examined between specific built environment features and PA outcomes |
| Brownson, R. C., Hoehner, C. M., Day, K., Forsyth, A., & Sallis, J. F. (2009). Measuring the Built Environment for Physical Activity. State of the Science. <i>American Journal of Preventive Medicine</i> , 36(4 SUPPL.), S99–S123.e12.                                                                                                                  | Not a systematic search                                                                     |
| Bult, M. K., Verschuren, O., Jongmans, M. J., Lindeman, E., & Ketelaar, M. (2011). What influences participation in leisure activities of children and youth with physical disabilities? A systematic review. <i>Research in Developmental Disabilities</i> , 32(5), 1521–1529.                                                                           | Do not focus on the relationship between the built environment and PA outcomes              |

|                                                                                                                                                                                                                                                                                                                                            |                                                                                                                        |
|--------------------------------------------------------------------------------------------------------------------------------------------------------------------------------------------------------------------------------------------------------------------------------------------------------------------------------------------|------------------------------------------------------------------------------------------------------------------------|
| Casey, R., Oppert, J. M., Weber, C., Charreire, H., Salze, P., Badariotti, D., ... Simon, C. (2014). Determinants of childhood obesity: What can we learn from built environment studies? <i>Food Quality and Preference</i> , 31(1), 164–172.                                                                                             | Focus on weight as the main outcome                                                                                    |
| Chillón, P., Evenson, K. R., Vaughn, A., & Ward, D. S. (2011). A systematic review of interventions for promoting active transportation to school. <i>The International Journal of Behavioral Nutrition and Physical Activity</i> , 8(1), 10.                                                                                              | No focus on the relationship between the built environment and PA                                                      |
| Cui, J., Loo, B. P. Y., & Lin, D. (2017). Travel behaviour and mobility needs of older adults in an ageing and car-dependent society. <i>International Journal of Urban Sciences</i> , 21(2), 109–128.                                                                                                                                     | Not a systematic search                                                                                                |
| D'Haese, S.; De Bourdeaudhuij, I.; Deforche, B.; Hinckson, E. . C., & G. (2012). A systematic review of the relationship between the built environment and different domains of physical activity in children. <i>Journal of Science and Medicine in Sport</i> , 15, S253.                                                                 | This article could not be accessed                                                                                     |
| Davison, K. K., Werder, J. L., Lawson, C. T. (2008). Children's active commuting to school: current knowledge and future directions. <i>Preventing Chronic Disease</i> , 5(3), A100.                                                                                                                                                       | Not a systematic search                                                                                                |
| De Sa, J., & Lock, K. (2008). Will European agricultural policy for school fruit and vegetables improve public health? A review of school fruit and vegetable programmes. <i>European Journal of Public Health</i> , 18(6), 558–568.                                                                                                       | No focus on the built environment as a disaggregated factor                                                            |
| De Vet, E., de Ridder, D. T. D., & de Wit, J. B. F. (2011). Environmental correlates of physical activity and dietary behaviours among young people: A systematic review of reviews. <i>Obesity Reviews</i> , 12(501).                                                                                                                     | Review of reviews describing papers already selected                                                                   |
| Ding, D., & Gebel, K. (2012). Built environment, physical activity, and obesity: What have we learned from reviewing the literature? <i>Health and Place</i> , 18(1), 100–105.                                                                                                                                                             | Focus on the methodology of review papers                                                                              |
| Ferdinand, A., O; Sen, B.; Rahurkar, S.; Engler, S.; Menachemi, N. (2012). The relationship between built environments and physical activity: a systematic review. <i>American Journal of Public Health</i> , 102(10), e7–e13.                                                                                                             | Focus on the methodology of primary studies                                                                            |
| Ferreira, I., Van Der Horst, K., Wendel-Vos, W., Kremers, S., Van Lenthe, F. J., & Brug, J. (2007). Environmental correlates of physical activity in youth - A review and update. <i>Obesity Reviews</i> .                                                                                                                                 | No focus on the built environment                                                                                      |
| Fleischhacker, S. E., Evenson, K. R., Rodriguez, D. A., & Ammerman, A. S. (2011). A systematic review of fast food access studies. <i>Obesity Reviews</i> , 12(501), e460–e471. <a href="https://doi.org/10.1111/j.1467-789X.2010.00715.x">https://doi.org/10.1111/j.1467-789X.2010.00715.x</a>                                            | No focus on the relationship of interest                                                                               |
| Foster, S., & Giles-Corti, B. (2008). The built environment, neighborhood crime and constrained physical activity: An exploration of inconsistent findings. <i>Preventive Medicine</i> , 47(3), 241–251.                                                                                                                                   | Global measures mixing built environment, SES and individual factors                                                   |
| Gim, T. H. T. (2013). The relationships between land use measures and travel behavior: A meta-analytic approach. <i>Transportation Planning and Technology</i> , 36(5), 413–434.                                                                                                                                                           | Travel understood as a broad category encompassing both motorized and non-motorized travels. No focus on active travel |
| Giskes, K., Kamphuis, C. B. M., Van Lenthe, F. J., Kremers, S., Droomers, M., & Brug, J. (2007). A systematic review of associations between environmental factors, energy and fat intakes among adults: Is there evidence for environments that encourage obesogenic dietary intakes? <i>Public Health Nutrition</i> , 10(10), 1005–1017. | No focus on the built environment                                                                                      |

|                                                                                                                                                                                                                                                                                                                                         |                                                                                                                    |
|-----------------------------------------------------------------------------------------------------------------------------------------------------------------------------------------------------------------------------------------------------------------------------------------------------------------------------------------|--------------------------------------------------------------------------------------------------------------------|
| Gomez, L. F., Sarmiento, R., Fernanda Ordonez, M., Felipe Pardo, C., de Sa, T. H., Mallarino, C. H., ... Quistberg, D. A. (2015). Urban environment interventions linked to the promotion of physical activity: A mixed methods study applied to the urban context of Latin America. <i>Social Science &amp; Medicine</i> , 131, 18–30. | Review of reviews describing papers already selected                                                               |
| Gray, J. A., Zimmerman, J. L., & Rimmer, J. H. (2012). Built environment instruments for walkability, bikeability, and recreation: Disability and universal design relevant? <i>Disability and Health Journal</i> , 5(2), 87–101.                                                                                                       | No examination of the relationship between the built environment features measured and PA levels                   |
| Gustafson, A., Hankins, S., & Jilcott, S. (2012). Measures of the Consumer Food Store Environment: A Systematic Review of the Evidence 2000-2011. <i>Journal of Community Health</i> , 37(4), 897–911. <a href="https://doi.org/10.1007/s10900-011-9524-x">https://doi.org/10.1007/s10900-011-9524-x</a>                                | No focus on the relationship of interest                                                                           |
| Hansen, A. Y., Umstattd Meyer, M. R., Lenardson, J. D., & Hartley, D. (2015). Built Environments and Active Living in Rural and Remote Areas: a Review of the Literature. <i>Current Obesity Reports</i> , 4(4), 484–493.                                                                                                               | Not a systematic search                                                                                            |
| Haselwandter, E. M., Corcoran, M. P., Foltz, S. C., Hyatt, R., Fenton, M., & Nelson, M. E. (2015). The Built Environment, Physical Activity, and Aging in the United States: A State of the Science Review. <i>Journal of Aging and Physical Activity</i> , 23(2), 323–329.                                                             | This article could not be accessed                                                                                 |
| Hinkley, T., Crawford, D., Salmon, J., Okely, A. D., & Hesketh, K. (2008). Preschool Children and Physical Activity. A Review of Correlates. <i>American Journal of Preventive Medicine</i> .                                                                                                                                           | No focus on the built environment                                                                                  |
| Jaarsma, E. A., Dijkstra, P. U., Geertzen, J. H. B., & Dekker, R. (2014). Barriers to and facilitators of sports participation for people with physical disabilities: A systematic review. <i>Adapted Physical Activity Quarterly</i> , 31, 1–11.                                                                                       | No focus on the built environment                                                                                  |
| Kaczynski, A. T., & Henderson, K. A. (2008). Parks and Recreation Settings and Active Living: A Review of Associations With Physical Activity Function and Intensity. <i>Journal of Physical Activity &amp; Health</i> , 5(4), 619–632.                                                                                                 | This article could not be accessed                                                                                 |
| Kerr, J., Rosenberg, D., & Frank, L. (2012). The Role of the Built Environment in Healthy Aging: Community Design, Physical Activity, and Health among Older Adults. <i>Journal of Planning Literature</i> , 27(1), 43–60.                                                                                                              | Not a systematic search                                                                                            |
| Kirk, S. F. L., Penney, T. L., & McHugh, T.-L. F. (2010). Characterizing the obesogenic environment: the state of the evidence with directions for future research. <i>Obesity Reviews</i> , 11(2), 109–117.                                                                                                                            | PA is one of the outcomes but there is no particular focus on its examination in relation to the built environment |
| Koohsari, M. J., Sugiyama, T., Sahlqvist, S., Mavoa, S., Hadgraft, N., & Owen, N. (2015). Neighborhood environmental attributes and adults' sedentary behaviors: Review and research agenda. <i>Preventive Medicine</i> , 77, 141–149.                                                                                                  | Focus on sedentary behaviors as the main outcome without any parallel focus on PA related behaviors                |
| Lee, H., Tamminen, K. A., Clark, A. M., Slater, L., Spence, J. C., & Holt, N. L. (2015). A meta-study of qualitative research examining determinants of children's independent active free play. <i>The International Journal of Behavioral Nutrition and Physical Activity</i> , 12, 5.                                                | No examination of the relationship between specific built environment features and PA outcomes                     |

|                                                                                                                                                                                                                                                                                                                                                                                                                         |                                                                                                    |
|-------------------------------------------------------------------------------------------------------------------------------------------------------------------------------------------------------------------------------------------------------------------------------------------------------------------------------------------------------------------------------------------------------------------------|----------------------------------------------------------------------------------------------------|
| Masoumi, H. E. (2017). Associations of built environment and children's physical activity: a narrative review. <i>Reviews on Environmental Health</i> , 32(4), 315–331.                                                                                                                                                                                                                                                 | Not a systematic search                                                                            |
| Maurer Braun, L., Read, A., & Ricklin, A. (2016). The Benefits of Street-Scale Features for Walking and Biking. <i>Journal of Transport &amp; Health</i> , 3(2), S22. <a href="https://doi.org/10.1016/j.jth.2016.05.060">https://doi.org/10.1016/j.jth.2016.05.060</a>                                                                                                                                                 | Process of the systematic search not detailed enough                                               |
| Mitra, R. (2013). Independent Mobility and Mode Choice for School Transportation: A Review and Framework for Future Research. <i>Transport Reviews</i> , 33(1), 21–43.                                                                                                                                                                                                                                                  | Not a systematic search                                                                            |
| Ogilvie, D., Foster, C. E., Rothnie, H., Cavill, N., Hamilton, V., Fitzsimons, C. F., & Mutrie, N. (2007). Interventions to promote walking: Systematic review. <i>British Medical Journal</i> , 334(7605), 1204–1207.                                                                                                                                                                                                  | No examination of the relationship between specific built environment features and PA behaviors    |
| Olsen, J. M. (2013). An integrative review of literature on the determinants of physical activity among rural women. <i>Public Health Nursing (Boston, Mass.)</i> , 30(4), 288–311.                                                                                                                                                                                                                                     | Very limited focus on the role of the built environment                                            |
| Panter, J. R., & Jones, A. (2010). Attitudes and the Environment as Determinants of Active Travel in Adults: What Do and Don't We Know? <i>Journal of Physical Activity and Health</i> , 7(4), 551–561.                                                                                                                                                                                                                 | This article could not be accessed                                                                 |
| Park, K. (2017). Psychological park accessibility: a systematic literature review of perceptual components affecting park use. <i>Landscape Research</i> , 42(5), 508–520.                                                                                                                                                                                                                                              | Focus on park use as the main outcome. No specific PA behavior identified and examined             |
| Rahman, T., Cushing, R. A., & Jackson, R. J. (2011). Contributions of Built Environment to Childhood Obesity. <i>Mount Sinai Journal of Medicine</i> , 78(1), 49–57.                                                                                                                                                                                                                                                    | This article could not be accessed                                                                 |
| Sallis, J. F., & Spoon, C. (2015). <i>Making the Case for Designing Active Cities</i> .                                                                                                                                                                                                                                                                                                                                 | Not a systematic search                                                                            |
| Sharma, M., Nahar, V.K. (2018). Promoting physical activity in upper elementary children using multi-theory model (MTM) of health behavior change. <i>J Prev Med Hyg [Internet]</i> . 59:E267–76. Available from: <a href="http://www.embase.com/search/results?subaction=viewrecord&amp;from=export&amp;id=L626004508">http://www.embase.com/search/results?subaction=viewrecord&amp;from=export&amp;id=L626004508</a> | Not a systematic search                                                                            |
| Siddiqi, Z., Tiro, J. A., & Shuval, K. (2011). Understanding impediments and enablers to physical activity among African American adults: A systematic review of qualitative studies. <i>Health Education Research</i> .                                                                                                                                                                                                | No focus on the built environment                                                                  |
| Sterdt, E., Liersch, S., & Walter, U. (2014). Correlates of physical activity of children and adolescents: A systematic review of reviews. <i>Health Education Journal</i> , 73(1), 72–89.                                                                                                                                                                                                                              | Review of reviews describing papers already selected                                               |
| Stewart, G., Anokye, N. K., & Pokhrel, S. (2015). What interventions increase commuter cycling? A systematic review. <i>BMJ Open</i> , 5(8), e007945.                                                                                                                                                                                                                                                                   | Focus on interventions' designs. No focus on the relationship between the built environment and PA |
| Temple, M., & Robinson, J. C. (2014). A systematic review of interventions to promote physical activity in the preschool setting. <i>Journal for Specialists in Pediatric Nursing</i> , 19(4), 274–284.                                                                                                                                                                                                                 | Very limited examination of built environment features                                             |
| Trost, S. G., Ward, D. S., & Senso, M. (2010). Effects of child care policy and environment on physical activity. <i>Medicine and Science in Sports and Exercise</i> , 42(3), 520–525.                                                                                                                                                                                                                                  | Not a systematic search                                                                            |

|                                                                                                                                                                                                                                                                                                                                                            |                                                                                                                                          |
|------------------------------------------------------------------------------------------------------------------------------------------------------------------------------------------------------------------------------------------------------------------------------------------------------------------------------------------------------------|------------------------------------------------------------------------------------------------------------------------------------------|
| Van Cauwenberghe, E., Maes, L., Spittaels, H., van Lenthe, F. J., Brug, J., Oppert, J.-M., & De Bourdeaudhuij, I. (2010). Effectiveness of school-based interventions in Europe to promote healthy nutrition in children and adolescents: systematic review of published and “grey” literature. <i>The British Journal of Nutrition</i> , 103(6), 781–797. | No built environment component                                                                                                           |
| Van Der Horst, K., Oenema, A., Ferreira, I., Wendel-Vos, W., Giskes, K., Van Lenthe, F., & Brug, J. (2007). A systematic review of environmental correlates of obesity-related dietary behaviors in youth. <i>Health Education Research</i> , 22(2), 203–226.                                                                                              | No focus on the built environment. Availability and accessibility are not being explicitly linked to specific built environment features |
| Van Der Horst, K., Paw, M. J. C. A., Twisk, J. W. R., & Van Mechelen, W. (2007). A brief review on correlates of physical activity and sedentariness in youth. <i>Medicine and Science in Sports and Exercise</i> .                                                                                                                                        | No examination of built environment components                                                                                           |
| Van Sluijs, E. M. F., McMinn, A. M., & Griffin, S. J. (2007). Effectiveness of interventions to promote physical activity in children and adolescents: systematic review of controlled trials. <i>BMJ</i> , 335(7622), 703.                                                                                                                                | No focus on the built environment                                                                                                        |
| Verloigne, M., Van Lippevelde, W., Maes, L., Brug, J., & De Bourdeaudhuij, I. (2012). Family- and school-based correlates of energy balance-related behaviours in 10-12-year-old children: A systematic review within the ENERGY (European Energy balance Research to prevent excessive weight Gain among Youth) project. <i>Public Health Nutrition</i> . | No focus on the built environment                                                                                                        |
| Walker, R. E., Keane, C. R., & Burke, J. G. (2010). Disparities and access to healthy food in the United States: A review of food deserts literature. <i>Health and Place</i> , 16(5), 876–884.                                                                                                                                                            | Focus on a SES perspective. Do not investigate the relationship between access to healthy food and its consumption                       |
| Wang, Y., Chau, C. K., Ng, W. Y., & Leung, T. M. (2016). A review on the effects of physical built environment attributes on enhancing walking and cycling activity levels within residential neighborhoods. <i>Cities</i> , 50, 1–15. <a href="https://doi.org/10.1016/j.cities.2015.08.004">https://doi.org/10.1016/j.cities.2015.08.004</a>             | Process of the systematic search not detailed enough                                                                                     |
| Ward, D. S., Welker, E., Choate, A., Henderson, K. E., Lott, M., Tovar, A., ... Sallis, J. F. (2017). Strength of obesity prevention interventions in early care and education settings: A systematic review. <i>Preventive Medicine</i> , 95 Suppl, S37–S52.                                                                                              | No focus on the built environment                                                                                                        |
| Yang, L., Sahlqvist, S., McMinn, A., Griffin, S. J., & Ogilvie, D. (2010). Interventions to promote cycling: Systematic review. <i>BMJ (Online)</i> .                                                                                                                                                                                                      | No focus on the built environment                                                                                                        |
