# Supplementary material for: Built Environment and Health Behaviors: Deconstructing the Black Box of Interactions—A Review of Reviews
Source: MDPI journal article supplement (doi:10.3390/ijerph16081454), 2019-04-24
Supplement: s1 [file s1]

**Supplementary Table S8 – Included records: description of Subset 1 and Subset 2.**

|                                                                            | Records              | Type | Date range            | Included Studies | Aim & Objective                                                                                                       | Population                                                              | Methodology                       | Key findings                                                                                                                                                                                                                             |
|----------------------------------------------------------------------------|----------------------|------|-----------------------|------------------|-----------------------------------------------------------------------------------------------------------------------|-------------------------------------------------------------------------|-----------------------------------|------------------------------------------------------------------------------------------------------------------------------------------------------------------------------------------------------------------------------------------|
| <i>Subset 1: coded articles included in the narrative synthesis (n=45)</i> |                      |      |                       |                  |                                                                                                                       |                                                                         |                                   |                                                                                                                                                                                                                                          |
| 1                                                                          | Adkins et al., 2017  | PA   | None                  | 17               | Examine the effect of the built environment on PA in different socioeconomic contexts                                 | Socially disadvantaged population (low-income, racial minorities, poor) | Review                            | The observed effects of the built environment on PA seem to be weaker for disadvantaged than for advantaged population groups                                                                                                            |
| 2                                                                          | Arango et al., 2013  | PA   | 1990-6 Aug 2012       | 15               | Examine the relationship between perceived environmental attributes and physical activity among Latin American adults | Adults & older adults in Latin America                                  | Systematic Review                 | Safety was found to be related to leisure-time PA while street lightning was related to transport-related PA                                                                                                                             |
| 3                                                                          | Barnett et al., 2017 | PA   | Jan 2000 - 3 Sep 2016 | 100              | Examine built environmental correlates of PA among older adults by type of PA and environmental attribute measurement | Older adults (≥65)                                                      | Systematic Review & Meta-Analysis | Walkability, safety, accessibility, availability, design and aesthetics were positively correlated to older adult's PA levels. Associations strength varied depending on PA types and environmental attributes measurement methodologies |
| 4                                                                          | Bauman et al., 2012  | PA   | 1 Jan 1999 -          | 25               | Examine the correlates and determinants of active leisure, recreation and active                                      | Adults (≥18) and children (5-13) and                                    | Review of Reviews                 | Multiple built environment attributes among which land-use mix and walkability were                                                                                                                                                      |

|   |                         |           |                     |    |                                                                                                                     |                                                 |                            |                                                                                                                                                                                                                                                   |
|---|-------------------------|-----------|---------------------|----|---------------------------------------------------------------------------------------------------------------------|-------------------------------------------------|----------------------------|---------------------------------------------------------------------------------------------------------------------------------------------------------------------------------------------------------------------------------------------------|
|   |                         |           | Apr 2012            |    | transportation among children and adults in developed and developing countries                                      | adolescents (12-18)                             |                            | associated with PA. The strength of factors varied in function of age and the development situation of the country                                                                                                                                |
| 5 | Bloemen et al., 2015    | PA        | Jan 2000 - May 2013 | 18 | Identify the key factors associated with PA in children and adolescent with physical disabilities                   | Children with a physical disability (aged 4-18) | Systematic Review          | Adequate sport equipment and access to transport were found to be associated with PA in children with a physical disability                                                                                                                       |
| 6 | Carlin et al., 2017     | PA        | Jan 2004-Apr 2016   | 31 | Identify the physical environmental determinants that influence PA across the life course                           | Children, Adolescents, Adults                   | Umbrella Systematic Review | Availability and safety of infrastructure and equipment were positively associated with physical activity in children and adolescents whereas negative street characteristics aspects were negatively associated with physical activity in adults |
| 7 | Casagrande et al., 2009 | PA & Diet | -Jul 2007           | 10 | Examine association of the built environment with PA and Diet among African Americans                               | African American Adults $\geq 18$               | Systematic Review          | Light traffic, presence of sidewalks and safety from crime tend to be positively associated with PA. Presence of supermarkets and specialty stores positively associated with consumption of fruit and vegetables                                 |
| 8 | Caspi et al., 2012      | Diet      | - March 2011        | 38 | Evaluate the relationship between the food environment and diet & explore the different dimensions of "food access" | Adult, Children, Adolescent                     | Systematic Review          | GIS-based measures were the most commonly used but were less consistently associated with diet than surveys and store audits                                                                                                                      |

|    |                         |           |                                     |     |                                                                                                                                      |                                      |                                   |                                                                                                                                                                                                                                                                             |
|----|-------------------------|-----------|-------------------------------------|-----|--------------------------------------------------------------------------------------------------------------------------------------|--------------------------------------|-----------------------------------|-----------------------------------------------------------------------------------------------------------------------------------------------------------------------------------------------------------------------------------------------------------------------------|
|    |                         |           |                                     |     |                                                                                                                                      |                                      |                                   |                                                                                                                                                                                                                                                                             |
| 9  | Cerin et al., 2017      | PA        | Jan 2000 – 6 <sup>th</sup> Sep 2016 | 42  | Examine and quantify the strength of evidence for environment-Active transport (AT) associations                                     | Older adults (≥65)                   | Systematic Review & Meta-Analysis | Urban form features, good design and access were positively associated with AT walking whereas negative features such as neighborhood disorder were negatively associated with AT walking                                                                                   |
| 10 | Correa et al., 2015     | Diet      | 2003-2013                           | 90  | Examine association between availability of food retailers and obesity in schoolchildren and adolescent                              | Schoolchildren, Adolescent           | Narrative literature review       | Distance to convenience stores was positively associated with healthier diets                                                                                                                                                                                               |
| 11 | D'Haese et al., 2015    | PA        | Jan 2000 - Aug 2014                 | 65  | Examine the relationship between six environmental variable groups and active travel to school                                       | Children (6-12)                      | Systematic Review                 | Walkability, density and accessibility associated with walking for AT to school                                                                                                                                                                                             |
| 12 | De Craemer et al., 2012 | PA & Diet | Jan 1990 – Sep 2010                 | 43  | Examine the correlates - notably the physical environment correlates - of physical activity, sedentary behavior and eating behaviors | Preschool children (4 to 6-year-old) | Systematic Review                 | Several physical environmental variables such as outdoor space and characteristics were correlated with higher levels of physical activity & accessibility to school (short distances, absence of barriers) was associated with higher levels of active transport to school |
| 13 | Ding et al., 2011       | PA        | -Jan 2010                           | 103 | Find neighborhood environment correlates of youth physical activity                                                                  | Children (3-18)                      | Review                            | The strength of associations varied in function of the measurement methodologies employed                                                                                                                                                                                   |

|    |                              |      |                  |    |                                                                                                                                              |                                      |                   |                                                                                                                                                                                                                                              |
|----|------------------------------|------|------------------|----|----------------------------------------------------------------------------------------------------------------------------------------------|--------------------------------------|-------------------|----------------------------------------------------------------------------------------------------------------------------------------------------------------------------------------------------------------------------------------------|
|    |                              |      |                  |    |                                                                                                                                              |                                      |                   | <p>Walkability, traffic speed and volume, access to recreational facilities, diversity and density were positively correlated to children PA</p> <p>Land-use mix, and residential density were the strongest correlates for adolescents.</p> |
| 14 | Eisenberg et al., 2017       | PA   | 1990 - 2015      | 15 | Examine the built environment as a potential moderator of the relationship between having a disability and lower levels of physical activity | Persons with disabilities (PWD)      | Systematic Review | Findings suggests a positive moderating effect of safety, aesthetic and design on the PA levels of persons with disabilities                                                                                                                 |
| 15 | Engler-Stringer et al., 2014 | Diet | 1995 – July 2013 | 26 | Evaluate the influence of the community and consumer nutrition environments on the diet of children                                          | Children under age 18                | Systematic Review | Objective and perceived measures of availability, accessibility and affordability showed that these factors play a role in defining the food environment and are associated with some characteristics of poor dietary intake                 |
| 16 | Escalante et al., 2014       | PA   | -31 May 2012     | 8  | Examine built environment interventions aimed at increasing children's physical activity during school recess                                | Pre-schoolers school-children (2-12) | Systematic Review | Found that changes in playground markings together with an improvement of physical structures increase active recess among schoolchildren in the short to medium term                                                                        |

|    |                       |           |                     |     |                                                                                                                            |                                                   |                             |                                                                                                                                                                                                                                                                                                                 |
|----|-----------------------|-----------|---------------------|-----|----------------------------------------------------------------------------------------------------------------------------|---------------------------------------------------|-----------------------------|-----------------------------------------------------------------------------------------------------------------------------------------------------------------------------------------------------------------------------------------------------------------------------------------------------------------|
| 17 | Feng et al., 2010     | PA & Diet | (?) - 2008          | 63  | Evaluate built environment-behavior (obesity related outcomes) associations across studies using different methodologies   | General population                                | Systematic Review           | Methodological heterogeneity could explain the absence of associations in some study                                                                                                                                                                                                                            |
| 18 | Fraser & Lock, 2011   | PA        | -Jun 2009           | 21  | Examine the relationship between the built environment and cycling                                                         | General population                                | Systematic Review           | Availability density proximity safety were identified as positively correlated to cycling. Destination proximity, safety, design barriers were identified as negative factors of cycling                                                                                                                        |
| 19 | Frerichs et al., 2015 | Diet      | -2015               | 102 | Examine the relationship between school architecture and design on healthy eating                                          | Children: kinder garden to 12 <sup>th</sup> grade | Narrative systematic review | Serving water and vending machines access were found to have an impact on children's dietary choices                                                                                                                                                                                                            |
| 20 | Frost et al., 2010    | PA        | -Jun 2008           | 20  | Examine the influence of the built environment on adults' PA in rural settings                                             | Adults ( $\geq 18$ ) in rural settings            | Review                      | Aesthetics, trails availability, destination accessibility and safety were found to be associated with PA in rural settings                                                                                                                                                                                     |
| 21 | Galvez et al., 2010   | PA & Diet | Jan 2008 – Aug 2009 | 48  | Examine the role of neighborhoods factors such as the built environment in childhood obesity and obesity related behaviors | Children (under 18)                               | Review                      | PA and diet outcomes varied across studies by individual and community level characteristics. Community level factors such as features promoting active commuting and walkability were found to be linked to individual's behaviors but are not yet specifically detailed in the Ecological System Theory Model |

|    |                               |           |                     |     |                                                                                                                                                                                           |                                                                        |                   |                                                                                                                                                                                |
|----|-------------------------------|-----------|---------------------|-----|-------------------------------------------------------------------------------------------------------------------------------------------------------------------------------------------|------------------------------------------------------------------------|-------------------|--------------------------------------------------------------------------------------------------------------------------------------------------------------------------------|
|    |                               |           |                     |     |                                                                                                                                                                                           |                                                                        |                   |                                                                                                                                                                                |
| 22 | Giskes et al., 2011           | Diet      | Jan 2005 – Oct 2008 | 28  | Examine the association between physical environmental factors and obesogenic dietary behaviors                                                                                           | Adults > 18                                                            | Systematic Review | Accessibility factors play a significant role in the relationship between the physical environment and diet related behaviors                                                  |
| 23 | Glanz et al., 2012            | Diet      | 1995 - 2010         | 125 | Examine the relationship between grocery store marketing strategies modifying the built environment and diet-related behaviors such as healthful eating                                   | Consumers                                                              | Review            | Increasing availability, affordability, prominence and promotion of healthful foods and/or restricting the marketing of unhealthy foods was found to increase healthful eating |
| 24 | Grasser et al., 2013          | PA        | -Aug 2010           | 34  | Examine 4 GIS-based measures of walkability (density, land-use mix, connectivity and walkability indexes) in urban and suburban settings and their association with active transportation | Healthy white adults (> 19) living in urban and suburban neighborhoods | Systematic Review | Population density, intersection density and walkability indexes were positively associated with active travel                                                                 |
| 25 | Kaczynski & Henderson, 2007   | PA        | 1998 - 2005         | 50  | Examine the relationship between parks and recreation settings - as features of the built environment - and physical activity                                                             | Parks and recreation facilities users                                  | Review            | Parks and recreation accessibility was generally found to be associated with increased physical activity                                                                       |
| 26 | Kahn-Marshall & Gallant, 2012 | PA & Diet | 1995 - 2010         | 27  | Examine - among other things - the effectiveness of worksite health promotion                                                                                                             | Work-site employee                                                     | Systematic Review | Increased desirability, affordability and availability of healthy food options showed                                                                                          |

|    |                        |      |                     |    |                                                                                                                                                       |                           |                   |                                                                                                                                                                                                                      |
|----|------------------------|------|---------------------|----|-------------------------------------------------------------------------------------------------------------------------------------------------------|---------------------------|-------------------|----------------------------------------------------------------------------------------------------------------------------------------------------------------------------------------------------------------------|
|    |                        |      |                     |    | programs such as physical environment changes on employees' physical activity and diet related behaviors in the workplace                             |                           |                   | positive impacts on dietary behaviors & stair prompts, motivational signs, skip-stop elevators and stairwells modifications were linked to increased physical activity                                               |
| 27 | Kaushal & Rhodes, 2014 | PA   | -May 2014           | 49 | Examine the relationship between the home physical environment and adults/children's PA and sedentary behaviors                                       | Children, Adults          | Systematic Review | Large exercise equipment had a greater impact on PA than small ones. Quantity of these equipment was correlated with PA in girls. Availability of TVs was more strongly correlated with sedentary behaviors in girls |
| 28 | Kraak et al., 2017     | Diet | Jan 2000 - Dec 2016 | 5  | Examine the effect of nudges and choice architecture strategies aimed at promoting healthy food environments and healthy diets in restaurant settings | General population        | Systematic review | Identified 5 frameworks of choice architecture deconstructing the mechanisms of nudges on diet-related behaviors                                                                                                     |
| 29 | Krolner et al., 2011   | Diet | -Dec 2010           | 31 | Examine qualitative evidence of determinants of children's fruit and vegetable (FV) intake                                                            | Children 6 to 18-year-old | Systematic Review | Physical environment factors such as eating settings, visibility of and access to unhealthy food have been identified as influencing children's FV consumption                                                       |
| 30 | Larson et al., 2009    | Diet | 1985 – Apr 2008     | 54 | Examine neighborhood differences in access to food                                                                                                    | Neighborhood residents    | Review            | Residents with better access to supermarkets and limited access to convenience stores were found to have healthier diets.                                                                                            |

|    |                       |           |                          |    |                                                                                                                                                                           |                                                                                    |                   |                                                                                                                                                                                                                                                                                                                 |
|----|-----------------------|-----------|--------------------------|----|---------------------------------------------------------------------------------------------------------------------------------------------------------------------------|------------------------------------------------------------------------------------|-------------------|-----------------------------------------------------------------------------------------------------------------------------------------------------------------------------------------------------------------------------------------------------------------------------------------------------------------|
| 31 | Lawman & Wilson, 2012 | PA & Diet | 1995 - 2010              | 38 | Examine among other environmental factors the role of the neighborhood environment on physical activity, diet and sedentariness in youth at high risk for chronic disease | At risk youths (aged 10 to 18)                                                     | Review            | Home and neighborhood accessibility and safety were generally found to be significantly related to health behaviors. Availability of neighborhood resources for PA might increase the use of these resources although it may not be related to general PA. Moderators of this relationship are to be considered |
| 32 | Limstrand, 2008       | PA        | -Nov 2006                | 43 | Identify the role of the relevant factors playing a role in the relationship between sports facilities and youths' PA                                                     | Children and adolescents (2-19)                                                    | Review            | Access and user characteristics were found to be consistently correlated to youths' PA                                                                                                                                                                                                                          |
| 33 | Lovasi et al., 2009   | PA        | 1 Jan 1995 - 27 Jan 2009 | 45 | Examine the relationship between the built environment and obesity-related health disparities                                                                             | Disadvantages individuals or areas with low SES, or minorities (Black or Hispanic) | Review            | Supermarkets (instead of smaller grocery or convenience stores), places to exercise and safety were found to be potentially positively influential for the diet of the identified disadvantaged groups                                                                                                          |
| 34 | Lu et al., 2014       | PA        | Feb 2013                 | 39 | Examine the perceived barriers to children's active commuting to school                                                                                                   | Children and adolescents (4-19) and or related adults (parents and teachers)       | Systematic Review | Perceived traffic safety and perceived distance were among the most cited factors associated with children not actively commuting to school                                                                                                                                                                     |



|    |                          |           |                   |    |                                                                                                                                                            |                              |                                   |                                                                                                                                                                                         |
|----|--------------------------|-----------|-------------------|----|------------------------------------------------------------------------------------------------------------------------------------------------------------|------------------------------|-----------------------------------|-----------------------------------------------------------------------------------------------------------------------------------------------------------------------------------------|
| 35 | Mayne et al., 2015       | PA & Diet | 2005-2013         | 37 | Examine different methodologies and study designs that evaluate the impact of policy and built environment changes on obesity-related outcomes             | General population           | Systematic review                 | Improvements made to active transportation infrastructures have a positive impact on PA, notably cycling. Food availability was associated to consumption                               |
| 36 | McCormack & Shiell, 2011 | PA        | -                 | 33 | Examine the relationship between the built environment and physical activity by taking into accounts the mechanism of self-selection                       | Adults (≥18)                 | Systematic Review                 | The built environment was more likely to be associated to AT walking rather than other PA types and only a few studies found that residential self-selection attenuated the association |
| 37 | McGrath et al., 2015     | PA        | Jan 2000-Mar 2013 | 23 | examine the relationship between specific built environment attributes and children's and adolescents' PA levels (moderate-vigorous PA, including walking) | Children, Adolescents (5-17) | Systematic Review & Meta-Analysis | Play facilities, parks, playgrounds and street designs promoting walking had positive effects on adolescents PA but negative effects on children's PA                                   |
| 38 | Mhurchu et al., 2013     | Diet      | -31 Dec 2012      | 39 | Examine the associations between consumer and community food environments and dietary outcomes                                                             | General population           | Review                            | The influence of the availability of healthy foods on diets is moderated by the concurrent availability of unhealthy food                                                               |
| 39 | Moran et al., 2014       | PA        | 1996-2012         | 31 | Examine the relationship between the physical environment and older adults' PA                                                                             | Adults (≥65)                 | Review                            | Access to facilities, green open spaces and rest areas was found particularly relevant to explain older adults' PA behaviors                                                            |

|    |                        |           |                   |     |                                                                                                                                       |                                |                   |                                                                                                                                                                                                                                                                                    |
|----|------------------------|-----------|-------------------|-----|---------------------------------------------------------------------------------------------------------------------------------------|--------------------------------|-------------------|------------------------------------------------------------------------------------------------------------------------------------------------------------------------------------------------------------------------------------------------------------------------------------|
| 40 | Moschonis et al., 2015 | PA & Diet | Jan 1993-Apr 2013 | 81  | Develop a conceptual framework presenting the environmental and personal determinants of cardio-metabolic risk behaviors in childhood | Children (6 to 12)             | Review            | Availability, accessibility, safety and aesthetics of suitable infrastructures were found to influence cardio-metabolic related behaviors among children and adolescents                                                                                                           |
| 41 | Pucher et al., 2010    | PA        | 1990- (?)         | 139 | General population                                                                                                                    | General population             | Review            | The more people cycling, the highest the perception of safety ("safety in numbers"). Biker characteristics also play a role in the studied relationship                                                                                                                            |
| 42 | Saelens & Handy, 2008  | PA        | 2005-May 2006     | 42  | Examine the built environment correlates of walking                                                                                   | General population             | Review            | Positive relations found between walking for transportation and density, accessibility and diversity                                                                                                                                                                               |
| 43 | Shields et al., 2012   | PA        | -Sep 2012         | 14  | Examine the perceived barriers and facilitators to PA in children with disability                                                     | Children (<18) with disability | Systematic Review | Accessibility of facilities were notably found to impact PA levels in children with disability                                                                                                                                                                                     |
| 44 | Sugiyama et al., 2012  | PA        | -2011             | 46  | Examine the association of destination and route attribute with utilitarian and recreational walking                                  | Adults                         | Review            | Utilitarian walking was associated with availability and accessibility of retail and service destinations as well as with route design (functional aspects). Route aesthetics and the availability, proximity and quality of destinations was associated with recreational walking |

|                                                                                |                               |      |               |     |                                                                                                                 |                                              |                             |                                                                                                                                                                                                                         |
|--------------------------------------------------------------------------------|-------------------------------|------|---------------|-----|-----------------------------------------------------------------------------------------------------------------|----------------------------------------------|-----------------------------|-------------------------------------------------------------------------------------------------------------------------------------------------------------------------------------------------------------------------|
| 45                                                                             | Yen et al., 2014              | PA   | 1991-2011     | 123 | Examine how place influences older adult's decision about mobility, including PA levels                         | Adults (≥50)                                 | Review                      | Safety was at the hinge of the relationship between built environmental components such as connectivity, aesthetics and the decision of being physically active                                                         |
| <i>Subset 2: non-coded articles included in the narrative synthesis (n=62)</i> |                               |      |               |     |                                                                                                                 |                                              |                             |                                                                                                                                                                                                                         |
| 46                                                                             | Al-Khudairy et al. 2019       | Diet | -May 2017     | 18  | Examine relevant interventions using choice architecture to improve diet among healthcare staff                 | Healthcare staff of high income countries    | Systematic Review           | Choice architecture interventions focusing on proximity, availability and sizing were found to be effective on healthcare staff                                                                                         |
| 47                                                                             | An, Shen, Yang, & Yang, 2019  | PA   | 31 May 2018   | 20  | Examine the influence of built environment features and characteristics on PA and obesity among youths in China | Chinese children and/or adolescents aged ≤17 | Narrative Systematic Review | Increased PA levels and reduced sedentary behaviors were found to be associated with the availability and accessibility of built environment features such as parks, greenspaces, sidewalks and recreational facilities |
| 48                                                                             | Annear et al., 2014           | PA   | -             | 83  | Examine the influence of environmental factors on older adults' health and active ageing                        | Older adults (≥50)                           | Systematic Review           | Street lightning, traffic, accessibility to facilities, aesthetics, safety, density and infrastructure design were found to influence older adults' active ageing                                                       |
| 49                                                                             | Audrey & Batista-Ferrer, 2015 | PA   | - 29 Oct 2014 | 33  | Examine urban environment interventions aimed at increasing healthy behaviors such as PA among youths           | Children                                     | Systematic Review           | Road safety and active travel measures were found to be associated with physical activity among youths                                                                                                                  |
| 50                                                                             | Bancroft et al., 2015         | PA   | Jan 1990 -    | 20  | Examine the relationship between parks proximity and                                                            | General USA population                       | Systematic Review           | Mixed findings due to measurement heterogeneity. Five                                                                                                                                                                   |

|    |                                         |    |                      |    |                                                                                                                                           |                                                                            |                   |                                                                                                                                                                                                                                                              |
|----|-----------------------------------------|----|----------------------|----|-------------------------------------------------------------------------------------------------------------------------------------------|----------------------------------------------------------------------------|-------------------|--------------------------------------------------------------------------------------------------------------------------------------------------------------------------------------------------------------------------------------------------------------|
|    |                                         |    | Jun 2013             |    | density and physical activity among the USA population                                                                                    |                                                                            |                   | studies found that parks access was positively associated with PA                                                                                                                                                                                            |
| 51 | Bellicha et al., 2015                   | PA | -mid 2013            | 60 | Examine the effectiveness of stair-use interventions to promote PA on worksites                                                           | Worksite population                                                        | Systematic Review | The combination of motivational and directional signs led to a strong increase in stair climbing                                                                                                                                                             |
| 52 | Broekhuizen, Scholten, & de Vries, 2014 | PA | Jan 2000 - Sept 2012 | 30 | Examine the effect of preschool playgrounds on children's health, notably in terms of physical activity                                   | Children (2-18)                                                            | Systematic Review | Availability of playground equipment was found to be associated with PA among children                                                                                                                                                                       |
| 53 | Bull F, Hutton C, Cavill N, 2007        | PA | Jan 1990 - Jul 2006  | 10 | Examine the effect of built environment interventions on physical activity                                                                | Employees, children and others                                             | Systematic Review | Availability and aesthetics had a positive impact on PA in the workplace. Aesthetics had a positive impact on stair use and playgrounds use during school recess. Aesthetics and availability of equipment in the classroom also had a positive impact on PA |
| 54 | Dadpour, Pakzad, & Khankeh, 2016        | PA | 1990 - 9 Nov 2015    | 10 | Examine the influence of the environment on adult's walking                                                                               | Adults (18-65)                                                             | Meta-Synthesis    | Safety, aesthetics, convenience and efficiency were found to influence adult's walking                                                                                                                                                                       |
| 55 | Ding et al., 2018                       | PA | -Mar 2017            | 23 | Examine the influence of neighborhood environmental changes on PA, walking and travel behavior through the effects residential relocation | General population                                                         | Systematic Review | Increased walkability of the neighborhood environment was found to be associated with increased levels of walking among relocated populations                                                                                                                |
| 56 | Dobbins, Maureen, Tirilis, 2011         | PA | 1985 - May 2011      | 27 | Examine the effectiveness of population-based interventions on the built environment in relation to health outcomes, notably PA           | General population, children, adults and ethnic and low-income populations | Review of reviews | Street design, safety and aesthetics were found to enhance PA                                                                                                                                                                                                |

|    |                                                                 |           |                     |     |                                                                                                                                       |                               |                                   |                                                                                                                                                                                                                                                               |
|----|-----------------------------------------------------------------|-----------|---------------------|-----|---------------------------------------------------------------------------------------------------------------------------------------|-------------------------------|-----------------------------------|---------------------------------------------------------------------------------------------------------------------------------------------------------------------------------------------------------------------------------------------------------------|
| 57 | Durand, Andalib, Dunton, Wolch, & Pentz, 2011                   | PA        | 2000 - mid Mar 2009 | 44  | Review the built environment factors associated with PA and obesity risk and their implications for smart growth urban planning       | General population            | Systematic Review                 | Built environment attributes also identified as smart growth factors, namely diverse housing types, mixed land use, housing density, compact development patterns and levels of open space were associated with increased PA levels mostly related to walking |
| 58 | Ewing & Cervero, 2010                                           | PA        | -2009               | 61  | Examine the relationship between built environment factors and active travel in order to draw generalizable conclusions for practice  | General population            | Meta-Analysis                     | Land use diversity, intersection density, destination availability and accessibility were found to be related to walking. Transit proximity, street network design and land use diversity were related to bus and train use                                   |
| 59 | Farkas, Wagner, Nettel-Aguirre, Friedenreich, & McCormack, 2019 | PA        | -31 Dec 2016        | 25  | Examine the associations between objectively measured aspects and features of the built environment and walking among Canadian adults | Canadian adults ( $\geq 18$ ) | Systematized Review               | Specific behaviors such as walking for transportation were found to be associated with overall walkability and land use whereas proximity to destination was associated with walking for any purpose                                                          |
| 60 | Hajna et al., 2015                                              | PA        | -20 May 2014        | 6   | Examine the association between neighborhood walkability and PA (walking measured by biosensor daily steps) in adults                 | Adults ( $\geq 18$ )          | Systematic Review & Meta-Analysis | Adults living in more walkable neighborhoods had higher levels of PA                                                                                                                                                                                          |
| 61 | Hollands et al., 2013                                           | PA & Diet | 1948-Jun 2011       | 440 | Examine the effects of choice architecture interventions in micro-environment on health-related behaviors,                            | General population            | Scoping Review                    | Food accessibility, proximity, portion sizing and aesthetics improvements were consistently found to be associated with healthy diet outcomes. Prompting                                                                                                      |

|    |                                                       |    |                 |    |                                                                                                                                 |                                |                   |                                                                                                                                                                                                                    |
|----|-------------------------------------------------------|----|-----------------|----|---------------------------------------------------------------------------------------------------------------------------------|--------------------------------|-------------------|--------------------------------------------------------------------------------------------------------------------------------------------------------------------------------------------------------------------|
|    |                                                       |    |                 |    | notably diet and physical activity                                                                                              |                                |                   | and priming where also found to have a positive impact both on PA and diet                                                                                                                                         |
| 62 | Hunter et al., 2015                                   | PA | -July 2014      | 12 | Examine the effectiveness of interventions promoting PA in urban green space                                                    | General population             | Systematic Review | An association was found between urban green space and PA levels in the population. Interventions combining built environment modification and activity programs were found to have a positive impact on PA levels |
| 63 | Lachowycz & Jones, 2011                               | PA | 2000-2010       | 60 | Examine the association between objectively measured access to greenspace and obesity-related outcome, including PA             | General population             | Systematic Review | The association between greenspace and PA was positive but varied in function of personal factors such as age or socioeconomic status (SES)                                                                        |
| 64 | A. C. K. Lee & Maheswaran, 2011                       | PA | 1990 - Jun 2010 | 35 | Examine the positive health impacts of urban green spaces and public open spaces                                                | High income country population | Review            | Accessibility and quality of parks were identified as factors that affect their use for PA along with other personal factors such as age, gender or ethnicity that tend to shape the perception of safety          |
| 65 | L.-L. Lee, Kuo, & Chan, 2016                          | PA | -               | 5  | Examine the associations between attributes of the built environment and physical activity in adolescents dwelling in East Asia | East Asian Adolescents (10-19) | Systematic Review | Barriers to public facilities accessibility was negatively associated with PA. Gender differences were also noticed between boys and girls                                                                         |
| 66 | Maitland, Stratton, Foster, Braham, & Rosenberg, 2013 | PA | 2005-2011       | 49 | Examine the influence of the home physical environment on children's PA                                                         | Children (8-14)                | Systematic Review | The availability of media equipment was associated with sedentary behaviors. PA equipment in the home was not                                                                                                      |

|    |                                                           |    |                     |    |                                                                                                |                    |                   |                                                                                                                                                                                                              |
|----|-----------------------------------------------------------|----|---------------------|----|------------------------------------------------------------------------------------------------|--------------------|-------------------|--------------------------------------------------------------------------------------------------------------------------------------------------------------------------------------------------------------|
|    |                                                           |    |                     |    |                                                                                                |                    |                   | associated with PA although it was inversely associated with sedentary behaviors                                                                                                                             |
| 67 | Malambo, Kengne, De Villiers, Lambert, & Puoane, 2016     | PA | 2005-Apr 2015       | 18 | Examine the influence of built environmental attributes on cardiovascular disease outcomes     | Adults (≥18)       | Systematic Review | Several built environment attributes such as residential density, safety from traffic, recreational facilities, street connectivity and high walkable environment were found to be associated with PA        |
| 68 | McCormack, Rock, Toohey, & Hignell, 2010                  | PA | 1995-2008           | 21 | Examine qualitative evidence of the association of urban parks characteristics with use and PA | General population | Review            | Safety, aesthetics, amenities, maintenance and proximity were found to be associated with park use. Perceptions of the physical environment were strongly related with perceptions of the social environment |
| 69 | McCrorie, Fenton, & Ellaway, 2014                         | PA | -12th June 2013     | 14 | Examine the relationship between the environment and objectively measured PA in children       | Children (5-18)    | Review            | Roads, streets, school grounds and the home location were found to be important locations for PA. Children expose to green spaces tend to be more physically active                                          |
| 70 | Nocon, Muller-Riemenschneider, Nitzschke, & Willich, 2010 | PA | Jan 2001 - May 2008 | 25 | Examine the effectiveness of point-of-choice prompt in increasing PA                           | General population | Systematic Review | Point-of-choice prompts were effective in increasing stair climbing, particularly in escalator settings                                                                                                      |
| 71 | Oliveira, Moreira, Abreu, Mota, & Santos, 2014            | PA | Jan 2007-Jan 2012   | 28 | Examine the amount and type of environmental features or attributes influencing PA in children | Children (3-12)    | Systematic Review | Sidewalks and bike lanes were positively related to PA                                                                                                                                                       |

|    |                                                                       |           |                   |    |                                                                                                                                                        |                       |                   |                                                                                                                                                                                                       |
|----|-----------------------------------------------------------------------|-----------|-------------------|----|--------------------------------------------------------------------------------------------------------------------------------------------------------|-----------------------|-------------------|-------------------------------------------------------------------------------------------------------------------------------------------------------------------------------------------------------|
| 72 | Ikeda, Hinckson, Witten, & Smith, 2018                                | PA        | Jan 2000-Jul 2017 | 37 | Examine the associations between perceived physical environment aspects/features, sociodemographic characteristics and school travel modes in children | Children aged 5 to 13 | Systematic Review | Safety and walkability were found to positively influence active school travelling                                                                                                                    |
| 73 | Karmeniemi, Lankila, Ikaheimo, Koivumaa-Honkanen, & Korpelainen, 2018 | PA        | -Dec 2015         | 51 | Examine the influence of changes in the built environment on changes in behaviors pertaining to PA                                                     | General population    | Systematic Review | Both perceived and objective changes in the built environment were positively associated with changes in PA                                                                                           |
| 74 | Levy-Storms, Chen, & Loukaitou-Sideris, 2017                          | PA        | Jan 1970-Dec 2015 | 48 | Examine older adults' preferences and needs related to their PA in and near open spaces such as parks                                                  | Older adults (≥65)    | Systematic Review | Older adults have some specific needs and preferences pertaining to open spaces, that influence their behavior related to PA                                                                          |
| 75 | Luiu, Tight, & Burrow, 2018                                           | PA        | 1991-             | 54 | Examine the transport barriers influencing active travelling                                                                                           | Older adults          | Scoping review    | Built environment barriers to active travel for older adults mitigate the benefits provided by facilitators such as the availability of public transport or flexible transport services               |
| 76 | MacMillan et al., 2018                                                | PA & Diet | -May 2017         | 19 | Examine the effects of neighborhood built environment changes on PA and diet in residents                                                              | General population    | Systematic Review | The development of cycle/walking trails, rails stops/lines, supermarkets, farmers' markets, park and green spaces was found to be positively associated with increased PA and healthier diet outcomes |



|    |                                                |      |                    |    |                                                                                                                                         |                                                                   |                   |                                                                                                                                                                                                                                                                                                                                             |
|----|------------------------------------------------|------|--------------------|----|-----------------------------------------------------------------------------------------------------------------------------------------|-------------------------------------------------------------------|-------------------|---------------------------------------------------------------------------------------------------------------------------------------------------------------------------------------------------------------------------------------------------------------------------------------------------------------------------------------------|
| 77 | Marzi, Demetriou, & Reimers, 2018              | PA   | Jan 1990-Nov 2017  | 27 | Give an overview of socio-ecological correlates of independent mobility in children with a specific focus on sex and gender differences | Healthy children aged 3-12 (or with an average age in this range) | Systematic Review | Both the physical and the social environment were found to influence children's independent mobility. The social environment was found to be more influential, however, many aspects examined, such as the perception of traffic or fear of crime and stranger, were pertaining to both the physical environment and the social environment |
| 78 | Panter, Jones, & van Sluijs, 2008              | PA   | -                  | 24 | Examine the perceived and objectively measured environmental determinants of active travel in youth                                     | Children (5-18)                                                   | Systematic Review | Road safety, distance and urban form were found to influence children's active travel (walking and cycling)                                                                                                                                                                                                                                 |
| 79 | Parrish, Okely, Stanley, & Ridgers, 2013       | PA   | Jan 2000-Apr 2011  | 9  | Examine the effects of recess-based interventions youths' PA                                                                            | Children (5-18)                                                   | Systematic Review | Playground markings and games equipment were found to increase recess and lunchtime PA                                                                                                                                                                                                                                                      |
| 80 | Pont, Ziviani, Wadley, Bennett, & Abbott, 2009 | PA   | 1985 - May 2008    | 38 | Examine the environmental correlates of active transportation in youths                                                                 | Children (5-18)                                                   | Systematic Review | Distance was negatively associated with youths' PA                                                                                                                                                                                                                                                                                          |
| 81 | Rahmanian, Gasevic, Vukmirovich, & Lear, 2014  | Diet | Jan 2000-Sept 2013 | 24 | Examine the association between the built environment and diet                                                                          | Adults ( $\geq 18$ )                                              | Systematic Review | Accessibility was generally associated with greater consumption of fruits and vegetables                                                                                                                                                                                                                                                    |
| 82 | Renalds, Smith, & Hale, 2010                   | PA   | Jan 2003-Jan 2009  | 23 | Examine the relationship between the built environment and health                                                                       | General population                                                | Systematic Review | An association was found between walkable neighborhoods and increased PA                                                                                                                                                                                                                                                                    |
| 83 | Rhodes, Saelens, & Sauvage-Mar, 2018           | PA   | -Oct 2017          | 22 | Examine the interaction between the built                                                                                               | General population                                                | Systematic Review | Several aspects of the built environment were found to play a role in the interactions with PA:                                                                                                                                                                                                                                             |

|    |                                                  |    |                       |    |                                                                                                                                                 |                 |                     |                                                                                                                                                                                   |
|----|--------------------------------------------------|----|-----------------------|----|-------------------------------------------------------------------------------------------------------------------------------------------------|-----------------|---------------------|-----------------------------------------------------------------------------------------------------------------------------------------------------------------------------------|
|    |                                                  |    |                       |    | environment and social cognition to predict PA                                                                                                  |                 |                     | accessibility and convenience were found to be positively related to PA intention whereas perceived aspects such as aesthetics were found to negatively influence leisure-time PA |
| 84 | Ridgers, Salmon, Parrish, Stanley, & Okely, 2012 | PA | Jan 1990-Apr 2011     | 53 | Examine the correlates of school recess PA among youths                                                                                         | Children (5-18) | Systematic Review   | Availability of facilities and equipment were associated with recess PA                                                                                                           |
| 85 | Rosso, Auchincloss, & Michael, 2011              | PA | 1 Jan 1990-7 Dec 2010 | 17 | Examine the relationship between the objectively measured built environment and older adults' mobility                                          | Adults (18-60)  | Review              | Street connectivity, short distances, traffic, safety, destinations (parks and green spaces) were associated with mobility among older adults                                     |
| 86 | Rothman, Macpherson, Ross, & Buliung, 2018       | PA | Jan 1990-30 Jul 2016  | 63 | Examine the correlates of active travel to school in North America                                                                              | Children 4-12   | Systematic Review   | Distance to school was associated with active travel to school. Individual, parental and societal correlates were also found to have moderate positive associations with AST      |
| 87 | Salvo, Lashewicz, Doyle-Baker, & McCormack, 2018 | PA | -Apr 2016             | 36 | Analyzes the influences of the built environment on PA among adults, based on qualitative evidence                                              | Adults          | Systematized Review | Sociodemographic characteristics play a role in the relationship between the built environment and PA                                                                             |
| 88 | Sawyer, Ucci, Jones, Smith, & Fisher, 2017       | PA | 1980 - Feb 2016       | 46 | Examine the combined influence of neighborhood physical and social environments on PA and explore the interactions at play in this relationship | Adults (≥15)    | Systematic Review   | Physical and social environment features were found to play a simultaneous role on PA levels                                                                                      |

|    |                                 |           |                     |    |                                                                                                                                                                             |                           |                      |                                                                                                                                                                                                                                                                       |
|----|---------------------------------|-----------|---------------------|----|-----------------------------------------------------------------------------------------------------------------------------------------------------------------------------|---------------------------|----------------------|-----------------------------------------------------------------------------------------------------------------------------------------------------------------------------------------------------------------------------------------------------------------------|
| 89 | Schüle & Bolte, 2015            | PA        | -5th Nov 2013       | 33 | Examine both socioeconomic and built environment factors' influence on PA and identify their respective role and independent interactive effects in the association with PA | General population        | Systematic Review    | Interactions were found between the social and the built environment as well as with individual characteristics such as sex or ethnicity                                                                                                                              |
| 90 | Schulz, Romppel, & Grande, 2018 | PA & Diet | 1990-Sep 2016       | 25 | Examine the relationship between the built environment and leading risk factors and health behaviors in Germany                                                             | General German population | Systematic Review    | Access was found to be associated with sport-related PA                                                                                                                                                                                                               |
| 91 | Sharmin & Kamruzzaman, 2017     | PA        | Jan 1980 - May 2016 | 12 | Examine the built environment impact on children independent mobility                                                                                                       | Adults ( $\geq 18$ )      | Meta-Analytic Review | Dead-end streets were found to have the strongest positive association with children independent mobility among all the associations examined by the authors whereas land-use mix was the strongest negative association                                              |
| 92 | Sirard & Slater, 2008           | PA        | 1975-Mar 2007       | 40 | Examine, among other things, the correlates of active commuting to school                                                                                                   | Children                  | Review               | Parents' perceptions of their physical and social environment influence children's active commuting levels                                                                                                                                                            |
| 93 | Smith et al., 2017              | PA        | -Jun 2015           | 28 | Examine the effectiveness of environmental interventions to increase PA and active transport                                                                                | General population        | Systematic Review    | The evidence suggests that infrastructure improvements may mostly benefit to socioeconomically advantaged groups. There was a positive effect of walkability, availability of parks and playgrounds and improvements in active transport infrastructures on PA levels |

|     |                                                       |    |                                     |    |                                                                                                                                           |                            |                                   |                                                                                                                                                                                       |
|-----|-------------------------------------------------------|----|-------------------------------------|----|-------------------------------------------------------------------------------------------------------------------------------------------|----------------------------|-----------------------------------|---------------------------------------------------------------------------------------------------------------------------------------------------------------------------------------|
| 94  | Soler et al., 2010                                    | PA | -20<br>Apr<br>2005                  | 16 | Examine the effectiveness of point-of-decision prompts and enhancements to stairwells to increase stair use                               | General population         | Systematic Review                 | The interventions were followed by significant increases in stair use                                                                                                                 |
| 95  | Stanley, Ridley, & Dollman, 2012                      | PA | 1990-<br>Jan<br>2011                | 22 | Examine the correlates of children's PA during school recess and after-school periods                                                     | Children (8-14)            | Review                            | Access to equipment, playground markings and play space were associated with PA                                                                                                       |
| 96  | Stappers, Van Kann, Ettema, De Vries, & Kremers, 2018 | PA | -Feb<br>2018                        | 19 | Examine the relationship between built environment infrastructural changes and PA, including active transportation and sedentary behavior | Adults ( $\geq 18$ )       | Systematic Review                 | Bicycling was positively associated with proximity to the infrastructures                                                                                                             |
| 97  | Starnes, Troped, Klenosky, & Doehring, 2011           | PA | 1980-<br>2008                       | 52 | Examine the relationship between trails' features and PA                                                                                  | General population         | Review                            | Land-use mix and distance to trail were related to trail use                                                                                                                          |
| 98  | Stewart, 2011                                         | PA | 2000-<br>2008                       | 42 | Examine factors associated with active transportation to school                                                                           | Children ( $\leq 18$ )     | Review                            | Built environment factors such as distance and traffic were found to frequently influence active transportation to school                                                             |
| 99  | Van Cauwenberg et al., 2011                           | PA | Jan<br>2000-<br>Mar<br>2010         | 31 | Examine the relationship between the physical environment and PA in older adults                                                          | Older adults ( $\geq 65$ ) | Systematic Review                 | Only a few environmental characteristics were related to total PA, which suggests the need to analyze specific built environment features in relation to specific PA related outcomes |
| 100 | Van Cauwenberg et al., 2018                           | PA | 1 Jan<br>2000-<br>15<br>Dec<br>2017 | 72 | Examine the relationship between the built environment and leisure-time PA in older adults                                                | Older adults ( $\geq 65$ ) | Systematic Review & Meta-Analysis | Positive associations were found between leisure-time PA and walkability, land use mix access and aesthetics                                                                          |

|     |                                                         |      |                        |    |                                                                                                                                                      |                              |                   |                                                                                                                                                                                                                              |
|-----|---------------------------------------------------------|------|------------------------|----|------------------------------------------------------------------------------------------------------------------------------------------------------|------------------------------|-------------------|------------------------------------------------------------------------------------------------------------------------------------------------------------------------------------------------------------------------------|
| 101 | Van Hecke et al., 2018                                  | PA   | Jan 2000-Apr 2017      | 31 | Examine the relationship between adolescent public open spaces visitation/PA and the built environment characteristics of these places               | Adolescents (12-16)          | Systematic Review | A positive association was found between public open space visitation/PA and the availability of specific built environment features such as trails, playgrounds or sports fields                                            |
| 102 | Van Holle et al., 2012                                  | PA   | Jan 2000-Aug 2011      | 70 | Examine Europe-specific evidence on the associations between physical environment features and different PA domains in adults                        | Adults (18-65)               | Systematic Review | Walkability, access to destinations and environmental quality were found to be positively related to PA in adults. The strength of the relationship between the built environment and PA varied in function of the PA domain |
| 103 | Wendel-Vos, Droomers, Kremers, Brug, & van Lenthe, 2007 | PA   | 1 Jan 1980-31 Dec 2004 | 47 | Examine the potential determinants of different PA levels in adults                                                                                  | Adults ( $\geq 18$ )         | Systematic Review | Availability of equipment was found to be associated with PA/sports and connectivity of trails with active commuting                                                                                                         |
| 104 | Williams et al., 2014                                   | Diet | -Oct 2013              | 30 | Examine associations between the food environment (food outlets proximity to schools) and outcomes such as children's food purchases and consumption | Schoolchildren (5-18)        | Systematic Review | Little evidence was found of an effect of fast food proximity to schools with schoolchildren food purchase and consumption                                                                                                   |
| 105 | Wong, Faulkner, & Buliung, 2011                         | PA   | -May 2010              | 14 | Examine the relationship between objectively measured built environment features and active school travel in children and adolescents                | Children, Adolescents (5-18) | Systematic Review | Distance was consistently found to be negatively associated with active school travel                                                                                                                                        |
| 106 | Zapata-Diomedes & Veerman, 2016                         | PA   | 2009-15                | 23 | Examine Australian evidence for the association between                                                                                              | Adults ( $\geq 18$ )         | Systematic Review | Walkable neighborhood, destination diversity and land-                                                                                                                                                                       |

|     |                                    |    |           |    |                                                                                                            |                    |                   |                                                                                                                                                   |
|-----|------------------------------------|----|-----------|----|------------------------------------------------------------------------------------------------------------|--------------------|-------------------|---------------------------------------------------------------------------------------------------------------------------------------------------|
|     |                                    |    | Mar 2015  |    | the built environment and physical activity in adults                                                      |                    |                   | use mixed were found to be related to increased PA                                                                                                |
| 107 | Zhang, Wulff, Duan, & Wagner, 2019 | PA | 2008-2016 | 25 | Examine the influence of built environment characteristics of park and their neighborhood on park-based PA | General population | Systematic Review | The availability of paths/trails, lighting and the absence of broken glasses and litter were found to be positively associated with park-based PA |

## References

- Adkins, A., Makarewicz, C., Scanze, M., Ingram, M., & Luhr, G. (2017). Contextualizing Walkability Do Relationships Between Built Environments and Walking Vary by Socioeconomic Context? *Journal of the American Planning Association*, 83(3), 296–314. <https://doi.org/10.1080/01944363.2017.1322527>
- Al-Khudairy, L., Uthman, O. A., Walmsley, R., Johnson, S., & Oyebode, O. (2019). Choice architecture interventions to improve diet and/or dietary behaviour by healthcare staff in high-income countries: A systematic review. *BMJ Open*, 9(1). <https://doi.org/10.1136/bmjopen-2018-023687> LK
- An, R., Shen, J., Yang, Q., & Yang, Y. (2019). Impact of built environment on physical activity and obesity among children and adolescents in China: A narrative systematic review. *Journal of Sport and Health Science*. <https://doi.org/10.1016/j.jshs.2018.11.003> LK
- Annear, M., Keelings, S., Wilkinson, T. I. M., Cushman, G., Gidlow, B. O. B., & Hopkins H. (2014). Environmental influences on healthy and active ageing: a systematic review. *Ageing and Society*, 34(4), 590–622. <https://doi.org/10.1017/S0144686X1200116X>
- Arango, C. M., Paez, D. C., Reis, R. S., Brownson, R. C., & Parra, D. C. (2013). Association between the perceived environment and physical activity among adults in Latin America: a systematic review. *The International Journal of Behavioral Nutrition and*

- Physical Activity*, 10, 122. <https://doi.org/10.1186/1479-5868-10-122>
- Audrey, S., & Batista-Ferrer, H. (2015). Healthy urban environments for children and young people: A systematic review of intervention studies. *Health & Place*, 36, 97–117. <https://doi.org/10.1016/j.healthplace.2015.09.004>
- Bancroft, C., Joshi, S., Rundle, A., Hutson, M., Chong, C., Weiss, C. C., ... Lovasi, G. (2015). Association of proximity and density of parks and objectively measured physical activity in the United States: A systematic review. *Social Science & Medicine* (1982), 138, 22–30. <https://doi.org/10.1016/j.socscimed.2015.05.034>
- Barnett, D. W., Barnett, A., Nathan, A., Van Cauwenberg, J., Cerin, E., & Grp, C. O. A. W. (2017). Built environmental correlates of older adults' total physical activity and walking: a systematic review and meta-analysis. *International Journal of Behavioral Nutrition and Physical Activity*, 14. <https://doi.org/10.1186/s12966-017-0558-z>
- Bauman, A. E., Reis, R. S., Sallis, J. F., Wells, J. C., Loos, R. J. F., & Martin, B. W. (2012). Correlates of physical activity: Why are some people physically active and others not? *The Lancet*, 380(9838), 258–271. [https://doi.org/10.1016/S0140-6736\(12\)60735-1](https://doi.org/10.1016/S0140-6736(12)60735-1)
- Bellicha, A., Kieusseian, A., Fontvieille, A.-M., Tataranni, A., Charreire, H., & Oppert, J.-M. (2015). Stair-use interventions in worksites and public settings - a systematic review of effectiveness and external validity. *Preventive Medicine*, 70, 3–13. <https://doi.org/10.1016/j.ypmed.2014.11.001>
- Bloemen, M. A. T., Backx, F. J. G., Takken, T., Wittink, H., Benner, J., Mollema, J., & de Groot, J. F. (2015). Factors associated with physical activity in children and adolescents with a physical disability: a systematic review. *Developmental Medicine and Child Neurology*, 57(2), 137–148. <https://doi.org/10.1111/dmcn.12624>
- Broekhuizen, K., Scholten, A.-M., & de Vries, S. I. (2014). The value of (pre)school playgrounds for children's physical activity level: a systematic review. *The International Journal of Behavioral Nutrition and Physical Activity*, 11, 59. <https://doi.org/10.1186/1479-5868-11-59>
- Bull F, Hutton C, Cavill N, F. C. (2007). Physical activity and the environment review five: building design review. *NICE*, 8(London), 1–71. Retrieved from <https://www.nice.org.uk/guidance/ng90/evidence/building-design-evidence-review-pdf-4787281407>
- Carlin, A.; Perchoux, C.; Puggina, A.; Aleksovska, K.; Buck, C. . B., & C.; Cardon, G.; Chantal, S.; Ciarapica, D.; Condello, G.;

- Coppinger, T.; Cortis, C.; D'Haese, S.; De Craemer, M.; Di Blasio, A.; Hansen, S.; Iacoviello, L.; Issartel, J.; Izzicupo, P.; Jaeschke, L.; Kanning, M.; Kennedy, A.; Lakerveld, J.; Ling, F.C.M.; L, S. (2017). A life course examination of the physical environmental determinants of physical activity behaviour: A "Determinants of Diet and Physical Activity" (DEDIPAC) umbrella systematic literature review. *PLoS ONE*, 12(8). <https://doi.org/10.1371/journal.pone.0182083>
- Casagrande, S. S., Whitt-Glover, M. C., Lancaster, K. J., Odoms-Young, A. M., & Gary, T. L. (2009). Built environment and health behaviors among African Americans: a systematic review. *American Journal of Preventive Medicine*, 36(2), 174–181. <https://doi.org/10.1016/j.amepre.2008.09.037>
- Caspi, C. E., Sorensen, G., Subramanian, S. V., & Kawachi, I. (2012). The local food environment and diet: a systematic review. *Health & Place*, 18(5), 1172–87. <https://doi.org/10.1016/j.healthplace.2012.05.006>
- Cerin, E., Nathan, A., van Cauwenberg, J., Barnett, D. W., & Barnett, A. (2017). The neighbourhood physical environment and active travel in older adults: a systematic review and meta-analysis. *The International Journal of Behavioral Nutrition and Physical Activity*, 14(1), 15. <https://doi.org/10.1186/s12966-017-0471-5>
- Correa, E. N., Soares Schmitz, B. de A., & de Vasconcelos, F. de A. (2015). Aspects of the built environment associated with obesity in children and adolescents: A narrative review. *Revista de Nutricao-Brazilian Journal of Nutrition*, 28(3), 327–340. <https://doi.org/10.1590/1415-52732015000300009>
- D'Haese, S., Vanwolleghem, G., Hinckson, E., De Bourdeaudhuij, I., Deforche, B., Van Dyck, D., & Cardon, G. (2015). Cross-continental comparison of the association between the physical environment and active transportation in children: a systematic review. *The International Journal of Behavioral Nutrition and Physical Activity*, 12, 145. <https://doi.org/10.1186/s12966-015-0308-z>
- Dadpour, S., Pakzad, J., & Khankeh, H. (2016). Understanding the Influence of Environment on Adults' Walking Experiences: A Meta-Synthesis Study. *International Journal of Environmental Research and Public Health*, 13(7). <https://doi.org/10.3390/ijerph13070731>
- De Craemer, M., De Decker, E., De Bourdeaudhuij, I., Vereecken, C., Deforche, B., Manios, Y., & Cardon, G. (2012). Correlates of energy balance-related behaviours in preschool children: A systematic review. *Obesity Reviews*. <https://doi.org/10.1111/j.1467->



789X.2011.00941.x

- Ding, D., Sallis, J. F., Kerr, J., Lee, S., & Rosenberg, D. E. (2011). Neighborhood Environment and Physical Activity Among Youth A Review. *American Journal of Preventive Medicine*, 41(4), 442–455. <https://doi.org/10.1016/j.amepre.2011.06.036>
- Ding, D., Nguyen, B., Learnihan, V., Bauman, A. E., Davey, R., Jalaludin, B., & Gebel, K. (2018). Moving to an active lifestyle? A systematic review of the effects of residential relocation on walking, physical activity and travel behaviour. *British Journal of Sports Medicine*, 52(12), 789+. <https://doi.org/10.1136/bjsports-2017-098833>
- Dobbins, Maureen; Tirilis, D. (2011). Commissioned Reports Built Environment : A Synthesis of Review of Evidence, (3).
- Durand, C. P., Andalib, M., Dunton, G. F., Wolch, J., & Pentz, M. A. (2011). A systematic review of built environment factors related to physical activity and obesity risk: implications for smart growth urban planning. *Obesity Reviews : An Official Journal of the International Association for the Study of Obesity*, 12(5), e173-82. <https://doi.org/10.1111/j.1467-789X.2010.00826.x>
- Eisenberg, Y., Vanderbom, K. A., & Vasudevan, V. (2017). Does the built environment moderate the relationship between having a disability and lower levels of physical activity? A systematic review. *Preventive Medicine*, 95S, S75–S84. <https://doi.org/10.1016/j.ypmed.2016.07.019>
- Engler-Stringer, R., Le, H., Gerrard, A., & Muhajarine, N. (2014). The community and consumer food environment and children's diet: A systematic review. *BMC Public Health*. <https://doi.org/10.1186/1471-2458-14-522>
- Escalante, Y., Garcia-Hermoso, A., Backx, K., & Saavedra, J. M. (2014). Playground designs to increase physical activity levels during school recess: a systematic review. *Health Education & Behavior : The Official Publication of the Society for Public Health Education*, 41(2), 138–144. <https://doi.org/10.1177/1090198113490725>
- Ewing, R., & Cervero, R. (2010). Travel and the built environment. *Journal of the American Planning Association*, 76(3), 265–294. <https://doi.org/10.1080/01944361003766766>
- Farkas, B., Wagner, D. J., Nettel-Aguirre, A., Friedenreich, C., & McCormack, G. R. (2019). A systematized literature review on the associations between neighbourhood built characteristics and walking among Canadian adults. *Health Promotion and Chronic Disease Prevention in Canada Research Policy and Practice*, 39(1), 1–14. <https://doi.org/10.24095/hpcdp.39.1.01>
- Feng, J., Glass, T. A., Curriero, F. C., Stewart, W. F., & Schwartz, B. S. (2010). The built environment and obesity: A systematic review of the epidemiologic evidence. *Health and Place*, 16(2), 175–190. <https://doi.org/10.1016/j.healthplace.2009.09.008>

- Fraser, S. D. S., & Lock, K. (2011). Cycling for transport and public health: a systematic review of the effect of the environment on cycling. *European Journal of Public Health*, 21(6), 738–743. <https://doi.org/10.1093/eurpub/ckq145>
- Frerichs, L., Brittin, J., Sorensen, D., Trowbridge, M. J., Yaroch, A. L., Siahpush, M., ... Huang, T. T.-K. (2015). Influence of school architecture and design on healthy eating: a review of the evidence. *American Journal of Public Health*, 105(4), e46-57. <https://doi.org/10.2105/AJPH.2014.302453>
- Frost, S. S., Goins, R. T., Hunter, R. H., Hooker, S. P., Bryant, L. L., Kruger, J., & Pluto, D. (2010). Effects of the built environment on physical activity of adults living in rural settings. *American Journal of Health Promotion : AJHP*, 24(4), 267–283. <https://doi.org/10.4278/ajhp.08040532>
- Galvez, M. P., Pearl, M., & Yen, I. H. (2010). Childhood obesity and the built environment. *Current Opinion in Pediatrics*, 22(2), 202–207. <https://doi.org/10.1097/MOP.0b013e328336eb6f>
- Giskes, K., van Lenthe, F., Avendano-Pabon, M., & Brug, J. (2011). A systematic review of environmental factors and obesogenic dietary intakes among adults: are we getting closer to understanding obesogenic environments? *Obesity Reviews : An Official Journal of the International Association for the Study of Obesity*, 12(5), e95–e106. <https://doi.org/10.1111/j.1467-789X.2010.00769.x>
- Glanz, K., Bader, M. D. M., & Iyer, S. (2012). Retail grocery store marketing strategies and obesity: An integrative review. *American Journal of Preventive Medicine*. <https://doi.org/10.1016/j.amepre.2012.01.013>
- Grasser, G., Van Dyck, D., Titze, S., & Stronegger, W. (2013). Objectively measured walkability and active transport and weight-related outcomes in adults: a systematic review. *International Journal of Public Health*, 58(4), 615–625. <https://doi.org/10.1007/s00038-012-0435-0>
- Hajna, S., Ross, N. A., Brazeau, A.-S., Belisle, P., Joseph, L., & Dasgupta, K. (2015). Associations between neighbourhood walkability and daily steps in adults: a systematic review and meta-analysis. *BMC Public Health*, 15, 768. <https://doi.org/10.1186/s12889-015-2082-x>
- Hollands, G. J., Shemilt, I., Marteau, T. M., Jebb, S. A., Kelly, M. P., Nakamura, R., ... Ogilvie, D. (2013). Altering choice architecture to change population health behavior: a large-scale conceptual and empirical scoping review of interventions within micro-environments. *BMC Public Health*, 13(December), 1–203. <https://doi.org/10.1186/1471-2458-13-1218>

- Hunter, R. F., Christian, H., Veitch, J., Astell-Burt, T., Hipp, J. A., & Schipperijn, J. (2015). The impact of interventions to promote physical activity in urban green space: A systematic review and recommendations for future research. *Social Science & Medicine*, 124, 246–256. <https://doi.org/10.1016/j.socscimed.2014.11.051>
- Ikeda, E., Hinckson, E., Witten, K., & Smith, M. (2018). Associations of children's active school travel with perceptions of the physical environment and characteristics of the social environment: A systematic review. *Health & Place*, 54, 118–131. <https://doi.org/10.1016/j.healthplace.2018.09.009>
- Kaczynski, A. T., & Henderson, K. A. (2007). Environmental correlates of physical activity: A review of evidence about parks and recreation. *Leisure Sciences*. <https://doi.org/10.1080/01490400701394865>
- Kahn-Marshall, J. L., & Gallant, M. P. (2012). Making Healthy Behaviors the Easy Choice for Employees. *Health Education & Behavior*, 39(6), 752–776. <https://doi.org/10.1177/1090198111434153>
- Karmeniemi, M., Lankila, T., Ikaheimo, T., Koivumaa-Honkanen, H., & Korpelainen, R. (2018). The Built Environment as a Determinant of Physical Activity: A Systematic Review of Longitudinal Studies and Natural Experiments. *Annals of Behavioral Medicine*, 52(3), 239–251. <https://doi.org/10.1093/abm/kax043>
- Kaushal, N., & Rhodes, R. E. (2014). The home physical environment and its relationship with physical activity and sedentary behavior: a systematic review. *Preventive Medicine*, 67, 221–237. <https://doi.org/10.1016/j.ypmed.2014.07.026>
- Kraak, V. I., Englund, T., Misyak, S., & Serrano, E. L. (2017). A novel marketing mix and choice architecture framework to nudge restaurant customers toward healthy food environments to reduce obesity in the United States. *Obesity Reviews*, 18(8), 852–868. <https://doi.org/10.1111/obr.12553>
- Krolner, R., Rasmussen, M., Brug, J., Klepp, K.-I., Wind, M., & Due, P. (2011). Determinants of fruit and vegetable consumption among children and adolescents: a review of the literature. Part II: qualitative studies. *The International Journal of Behavioral Nutrition and Physical Activity*, 8, 112. <https://doi.org/10.1186/1479-5868-8-112>
- Lachowycz, K., & Jones, A. P. (2011). Greenspace and obesity: A systematic review of the evidence. *Obesity Reviews*, 12(501). <https://doi.org/10.1111/j.1467-789X.2010.00827.x>
- Larson, N. I., Story, M. T., & Nelson, M. C. (2009). Neighborhood Environments. Disparities in Access to Healthy Foods in the U.S. *American Journal of Preventive Medicine*. <https://doi.org/10.1016/j.amepre.2008.09.025>

- Lawman, H. G., & Wilson, D. K. (2012). A Review of Family and Environmental Correlates of Health Behaviors in High-Risk Youth. *Obesity*, 20(6), 1142–1157. <https://doi.org/10.1038/oby.2011.376>
- Lee, A. C. K., & Maheswaran, R. (2011). The health benefits of urban green spaces: a review of the evidence. *Journal of Public Health*, 33(2), 212–222. <https://doi.org/10.1093/pubmed/fdq068>
- Lee, L.-L., Kuo, Y.-L., & Chan, E. S.-Y. (2016). The Association Between Built Environment Attributes and Physical Activity in East Asian Adolescents: A Systematic Review. *Asia-Pacific Journal of Public Health*, 28(3), 206–218. <https://doi.org/10.1177/1010539516628174>
- Levy-Storms, L., Chen, L., & Loukaitou-Sideris, A. (2017). Older Adults' Needs and Preferences for Open Space and Physical Activity In and Near Parks: A Systematic Review. *Journal of Aging and Physical Activity*, 1–45. <https://doi.org/10.1123/japa.2016-0354>
- Limstrand, T. (2008). Environmental characteristics relevant to young people's use of sports facilities: a review. *Scandinavian Journal of Medicine & Science in Sports*, 18(3), 275–287. <https://doi.org/10.1111/j.1600-0838.2007.00742.x>
- Luiu, C., Tight, M., & Burrow, M. (2018). Factors Preventing the Use of Alternative Transport Modes to the Car in Later Life. *Sustainability*, 10(6). <https://doi.org/10.3390/su10061982>
- Lovasi, G. S., Hutson, M. A., Guerra, M., & Neckerman, K. M. (2009). Built Environments and Obesity in Disadvantaged Populations. *Epidemiologic Reviews*, 31(1), 7–20. <https://doi.org/10.1093/epirev/mxp005>
- Lu, W., McKyer, E. L. J., Lee, C., Goodson, P., Ory, M. G., & Wang, S. (2014). Perceived barriers to children's active commuting to school: a systematic review of empirical, methodological and theoretical evidence. *The International Journal of Behavioral Nutrition and Physical Activity*, 11, 140. <https://doi.org/10.1186/s12966-014-0140-x>
- Maitland, C., Stratton, G., Foster, S., Braham, R., & Rosenberg, M. (2013). A place for play? The influence of the home physical environment on children's physical activity and sedentary behaviour. *International Journal of Behavioral Nutrition and Physical Activity*, 10. <https://doi.org/10.1186/1479-5868-10-99>
- Malambo, P., Kengne, A. P., De Villiers, A., Lambert, E. V., & Puoane, T. (2016). Built Environment, Selected Risk Factors and Major Cardiovascular Disease Outcomes: A Systematic Review. *PLoS ONE*, 11(11). <https://doi.org/10.1371/journal.pone.0166846>
- Marzi, I., Demetriou, Y., & Reimers, A. K. (2018). Social and physical environmental correlates of independent mobility in children:

- a systematic review taking sex/gender differences into account. *International Journal of Health Geographics*, 17. <https://doi.org/10.1186/s12942-018-0145-9>
- Mayne, S. L., Auchincloss, A. H., & Michael, Y. L. (2015). Impact of policy and built environment changes on obesity-related outcomes: a systematic review of naturally occurring experiments. *Obesity Reviews : An Official Journal of the International Association for the Study of Obesity*, 16(5), 362–375. <https://doi.org/10.1111/obr.12269>
- McCormack, G. R., Rock, M., Toohey, A. M., & Hignell, D. (2010). Characteristics of urban parks associated with park use and physical activity: a review of qualitative research. *Health & Place*, 16(4), 712–726. <https://doi.org/10.1016/j.healthplace.2010.03.003>
- McCormack, G. R., & Shiell, A. (2011). In search of causality: a systematic review of the relationship between the built environment and physical activity among adults. *The International Journal of Behavioral Nutrition and Physical Activity*, 8, 125. <https://doi.org/10.1186/1479-5868-8-125>
- McCrorie, P. R. W., Fenton, C., & Ellaway, A. (2014). Combining GPS, GIS, and accelerometry to explore the physical activity and environment relationship in children and young people - a review. *The International Journal of Behavioral Nutrition and Physical Activity*, 11, 93. <https://doi.org/10.1186/s12966-014-0093-0>
- McGrath, L. J., Hopkins, W. G., & Hinckson, E. A. (2015). Associations of objectively measured built-environment attributes with youth moderate-vigorous physical activity: a systematic review and meta-analysis. *Sports Medicine (Auckland, N.Z.)*, 45(6), 841–865. <https://doi.org/10.1007/s40279-015-0301-3>
- MacMillan, F., George, E. S., Feng, X., Merom, D., Bennie, A., Cook, A., ... Astell-Burt, T. (2018). Do Natural Experiments of Changes in Neighborhood Built Environment Impact Physical Activity and Diet? A Systematic Review. *International Journal of Environmental Research and Public Health*, 15(2).
- Mhurchu, C. N., Vandevijvere, S., Waterlander, W., Thornton, L. E., Kelly, B., Cameron, A. J., ... INFORMAS. (2013). Monitoring the availability of healthy and unhealthy foods and non-alcoholic beverages in community and consumer retail food environments globally. *Obesity reviews*, 14(1, SI), 108–119. <https://doi.org/10.1111/obr.12080>
- Moran, M., Van Cauwenberg, J., Hercky-Linnewiel, R., Cerin, E., Deforche, B., & Plaut, P. (2014). Understanding the relationships

- between the physical environment and physical activity in older adults: a systematic review of qualitative studies. *The International Journal of Behavioral Nutrition and Physical Activity*, 11, 79. <https://doi.org/10.1186/1479-5868-11-79>
- Moschonis, G., Tsoutsouloupoulou, K., Efstathopoulou, E., Tsirigoti, L., Lambrinou, C.-P., Georgiou, A., ... Manios, Y. (2015). Conceptual framework of a simplified multi-dimensional model presenting the environmental and personal determinants of cardiometabolic risk behaviors in childhood. *Expert Review of Cardiovascular Therapy*, 13(6), 673–692. <https://doi.org/10.1586/14779072.2015.1039992>
- Nocon, M., Muller-Riemenschneider, F., Nitzschke, K., & Willich, S. N. (2010). Review Article: Increasing physical activity with point-of-choice prompts--a systematic review. *Scandinavian Journal of Public Health*, 38(6), 633–638. <https://doi.org/10.1177/1403494810375865>
- Oliveira, A. F., Moreira, C., Abreu, S., Mota, J., & Santos, R. (2014). Environmental determinants of physical activity in children: A systematic review. *Archives of Exercise in Health and Disease*, 4(2), 254–261. <https://doi.org/10.5628/aehtd.v4i2.158>
- Panter, J. R., Jones, A. P., & van Sluijs, E. M. (2008). Environmental determinants of active travel in youth: a review and framework for future research. *The International Journal of Behavioral Nutrition and Physical Activity*, 5, 34. <https://doi.org/10.1186/1479-5868-5-34>
- Parrish, A. M., Okely, A. D., Stanley, R. M., & Ridgers, N. D. (2013). The effect of school recess interventions on physical activity: A systematic review. *Sports Medicine*. <https://doi.org/10.1007/s40279-013-0024-2>
- Pont, K., Ziviani, J., Wadley, D., Bennett, S., & Abbott, R. (2009). Environmental correlates of children's active transportation: A systematic literature review. *Health and Place*, 15(3), 827–840. <https://doi.org/10.1016/j.healthplace.2009.02.002>
- Pucher, J., Dill, J., & Handy, S. (2010). Infrastructure, programs, and policies to increase bicycling: An international review. *Preventive Medicine*, 50(1), S106–S125. <https://doi.org/10.1016/j.ypmed.2009.07.028>
- Rahmanian, E., Gasevic, D., Vukmirovich, I., & Lear, S. A. (2014). The association between the built environment and dietary intake - a systematic review. *Asia Pacific Journal of Clinical Nutrition*, 23(2), 183–196.
- Renalds, A., Smith, T. H., & Hale, P. J. (2010). A systematic review of built environment and health. *Family & Community Health*, 33(1), 68–78. <https://doi.org/10.1097/FCH.0b013e3181c4e2e5>

- Rhodes, R. E., Saelens, B. E., & Sauvage-Mar, C. (2018). Understanding Physical Activity through Interactions Between the Built Environment and Social Cognition: A Systematic Review. *Sports Medicine*, 48(8), 1893–1912. <https://doi.org/10.1007/s40279-018-0934-0>
- Ridgers, N. D., Salmon, J., Parrish, A.-M., Stanley, R. M., & Okely, A. D. (2012). Physical activity during school recess: a systematic review. *American Journal of Preventive Medicine*, 43(3), 320–328. <https://doi.org/10.1016/j.amepre.2012.05.019>
- Rosso, A. L., Auchincloss, A. H., & Michael, Y. L. (2011). The urban built environment and mobility in older adults: A comprehensive review. *Journal of Aging Research*, 2011. <https://doi.org/10.4061/2011/816106>
- Rothman, L., Macpherson, A. K., Ross, T., & Buliung, R. N. (2018). The decline in active school transportation (AST): A systematic review of the factors related to AST and changes in school transport over time in North America. *Preventive Medicine*, 111, 314–322. <https://doi.org/10.1016/j.ypmed.2017.11.018>
- Saelens, B. E., & Handy, S. L. (2008). Built environment correlates of walking: A review. *Medicine and Science in Sports and Exercise*. <https://doi.org/10.1249/MSS.0b013e31817c67a4>
- Salvo, G., Lashewicz, B. M., Doyle-Baker, P. K., & McCormack, G. R. (2018). Neighbourhood Built Environment Influences on Physical Activity among Adults: A Systematized Review of Qualitative Evidence. *International Journal of Environmental Research and Public Health*, 15(5). <https://doi.org/10.3390/ijerph15050897>
- Sawyer, A., Ucci, M., Jones, R., Smith, L., & Fisher, A. (2017). Simultaneous evaluation of physical and social environmental correlates of physical activity in adults: A systematic review. *SSM - Population Health*, 3, 506–515. <https://doi.org/10.1016/j.ssmph.2017.05.008>
- Schüle, S. A., & Bolte, G. (2015). Interactive and independent associations between the socioeconomic and objective built environment on the neighbourhood level and individual health: A systematic review of multilevel studies. *PLoS ONE*, 10(4). <https://doi.org/10.1371/journal.pone.0123456>
- Schulz, M., Romppel, M., & Grande, G. (2018). Built environment and health: a systematic review of studies in Germany. *Journal of Public Health*, 40(1), 8–15. <https://doi.org/10.1093/pubmed/fdw141>
- Sharmin, S., & Kamruzzaman, M. (2017). Association between the built environment and children's independent mobility: A meta-analytic review. *Journal of Transport Geography*, 61, 104–117. <https://doi.org/10.1016/j.jtrangeo.2017.04.004>

- Shields, N., Synnot, A. J., & Barr, M. (2012). Perceived barriers and facilitators to physical activity for children with disability: a systematic review. *British Journal of Sports Medicine*. <https://doi.org/10.1136/bjsports-2011-090236>
- Sirard, J. R., & Slater, M. E. (2008). Walking and Bicycling to School: A Review. *American Journal of Lifestyle Medicine*. <https://doi.org/10.1177/1559827608320127>
- Smith, M., Hosking, J., Woodward, A., Witten, K., MacMillan, A., Field, A., ... Mackie, H. (2017). Systematic literature review of built environment effects on physical activity and active transport - an update and new findings on health equity. *International Journal of Behavioral Nutrition and Physical Activity*, 14. <https://doi.org/10.1186/s12966-017-0613-9>
- Soler, R. E., Leeks, K. D., Buchanan, L. R., Brownson, R. C., Heath, G. W., & Hopkins, D. H. (2010). Point-of-decision prompts to increase stair use. A systematic review update. *American Journal of Preventive Medicine*, 38(2 Suppl), S292-300. <https://doi.org/10.1016/j.amepre.2009.10.028>
- Stanley, R. M., Ridley, K., & Dollman, J. (2012). Correlates of children's time-specific physical activity: A review of the literature. *International Journal of Behavioral Nutrition and Physical Activity*. <https://doi.org/10.1186/1479-5868-9-50>
- Stappers, N. E. H., Van Kann, D. H. H., Ettema, D., De Vries, N. K., & Kremers, S. P. J. (2018). The effect of infrastructural changes in the built environment on physical activity, active transportation and sedentary behavior - A systematic review. *Health & Place*, 53, 135–149. <https://doi.org/10.1016/j.healthplace.2018.08.002>
- Starnes, H. A., Troped, P. J., Klenosky, D. B., & Doehring, A. M. (2011). Trails and Physical Activity: A Review. *Journal of Physical Activity & Health*, 8(8), 1160–1174. <https://doi.org/10.1123/jpah.8.8.1160>
- Stewart, O. (2011). Findings from research on active transportation to school and implications for safe routes to school programs. *Journal of Planning Literature*, 26(2), 127–150. <https://doi.org/10.1177/0885412210385911>
- Sugiyama, T., Neuhaus, M., Cole, R., Giles-Corti, B., & Owen, N. (2012). Destination and Route Attributes Associated with Adults' Walking: A Review. *Medicine and Science in Sports and Exercise*, 44(7), 1275–1286. <https://doi.org/10.1249/MSS.0b013e318247d286>
- Van Cauwenberg, J., De Bourdeaudhuij, I., De Meester, F., Van Dyck, D., Salmon, J., Clarys, P., & Deforche, B. (2011). Relationship between the physical environment and physical activity in older adults: A systematic review. *Health and Place*, 17(2), 458–469. <https://doi.org/10.1016/j.healthplace.2010.11.010>



- Van Cauwenberg, J., Nathan, A., Barnett, A., Barnett, D. W., Cerin, E., CEPA, & Grp, O. A. W. (2018). Relationships Between Neighbourhood Physical Environmental Attributes and Older Adults' Leisure-Time Physical Activity: A Systematic Review and Meta-Analysis. *Sports Medicine*, 48(7), 1635–1660. <https://doi.org/10.1007/s40279-018-0917-1>
- Van Hecke, L., Ghekiere, A., Veitch, J., Van Dyck, D., Van Cauwenberg, J., Clarys, P., & Deforche, B. (2018). Public open space characteristics influencing adolescents' use and physical activity: A systematic literature review of qualitative and quantitative studies. *Health and Place*, 51, 158–173. <https://doi.org/10.1016/j.healthplace.2018.03.008> LK
- Van Holle, V., Deforche, B., Van Cauwenberg, J., Goubert, L., Maes, L., de Weghe, N., & De Bourdeaudhuij, I. (2012). Relationship between the physical environment and different domains of physical activity in European adults: a systematic review. *BMC Public Health*, 12. <https://doi.org/10.1186/1471-2458-12-807>
- Wendel-Vos, W., Droomers, M., Kremers, S., Brug, J., & van Lenthe, F. (2007). Potential environmental determinants of physical activity in adults: a systematic review. *Obesity Reviews : An Official Journal of the International Association for the Study of Obesity*, 8(5), 425–440. <https://doi.org/10.1111/j.1467-789X.2007.00370.x>
- Williams, J., Scarborough, P., Matthews, A., Cowburn, G., Foster, C., Roberts, N., & Rayner, M. (2014). A systematic review of the influence of the retail food environment around schools on obesity-related outcomes. *Obesity Reviews*, 15(5), 359–374. <https://doi.org/10.1111/obr.12142>
- Wong, B. Y.-M., Faulkner, G., & Buliung, R. (2011). GIS measured environmental correlates of active school transport: a systematic review of 14 studies. *The International Journal of Behavioral Nutrition and Physical Activity*, 8, 39. <https://doi.org/10.1186/1479-5868-8-39>
- Yen, I. H., Fandel Flood, J., Thompson, H., Anderson, L. A., & Wong, G. (2014). How design of places promotes or inhibits mobility of older adults: realist synthesis of 20 years of research. *Journal of Aging and Health*, 26(8), 1340–1372. <https://doi.org/10.1177/0898264314527610>
- Zapata-Diomed, B., & Veerman, J. L. (2016). The association between built environment features and physical activity in the Australian context: a synthesis of the literature. *BMC Public Health*, 16, 484. <https://doi.org/10.1186/s12889-016-3154-2>
- Zhang, R., Wulff, H., Duan, Y., & Wagner, P. (2019). Associations between the physical environment and park-based physical

activity: A systematic review. *Journal of Sport and Health Science*. <https://doi.org/10.1016/j.jshs.2018.11.002> LK
