# Supplementary material for: Built Environment and Health Behaviors: Deconstructing the Black Box of Interactions—A Review of Reviews
Source: Int J Environ Res Public Health. 2019 Apr 24;16(8):1454. doi: 10.3390/ijerph16081454 (PMC6517917; doi:10.3390/ijerph16081454)
Supplement: Supplementary file 1 [file ijerph-16-01454-s001.zip]

Archive with 4 entries (3 files):
- ijerph-444662 Supplementary Materials - Final/
- ijerph-444662 Supplementary Materials - Final/Additional File 1 - Search strategy.pdf
- ijerph-444662 Supplementary Materials - Final/Additional File 2 - Excluded records.pdf
- ijerph-444662 Supplementary Materials - Final/Additional File 3 - Included records.pdf
